# Supplementary material for: Early analysis of the Australian COVID-19 epidemic
Source: eLife journal article supplement (doi:10.7554/elife.58785), 2020-08-13
Supplement: supp [file elife-58785-supp-v1.zip]

Archive with 8 entries (8 files):
- elife_poa_e58785_Transparent_Reporting_File.docx
- elife_poa_e58785_Source_data_1.zip
- elife_poa_e58785_Figure_1_figure_supplement_1.pdf
- elife_poa_e58785_Figure_1_figure_supplement_2.pdf
- elife_poa_e58785_Figure_2_figure_supplement_1.pdf
- elife_poa_e58785_Figure_2_figure_supplement_2.pdf
- elife_poa_e58785_Figure_2_figure_supplement_3.pdf
- elife_poa_e58785_Figure_3_figure_supplement_1.pdf
