# Supplementary material for: Early analysis of the Australian COVID-19 epidemic
Source: eLife journal article supplement (doi:10.7554/elife.58785), 2020-08-13
Supplement: supp [file elife_poa_e58785_Figure_2_figure_supplement_2.pdf › elife_poa_e58785_Figure_2_figure_supplement_2.pdf]

**New South Wales (NSW)**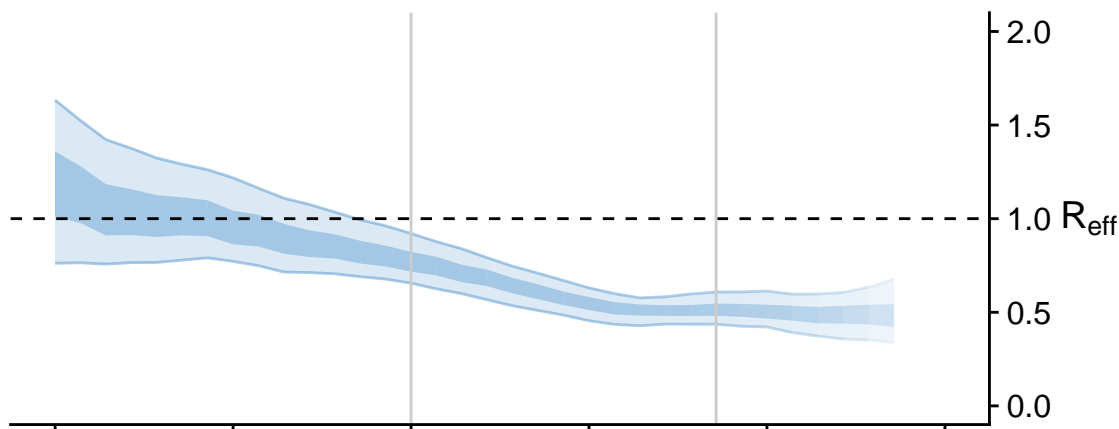**Queensland (QLD)**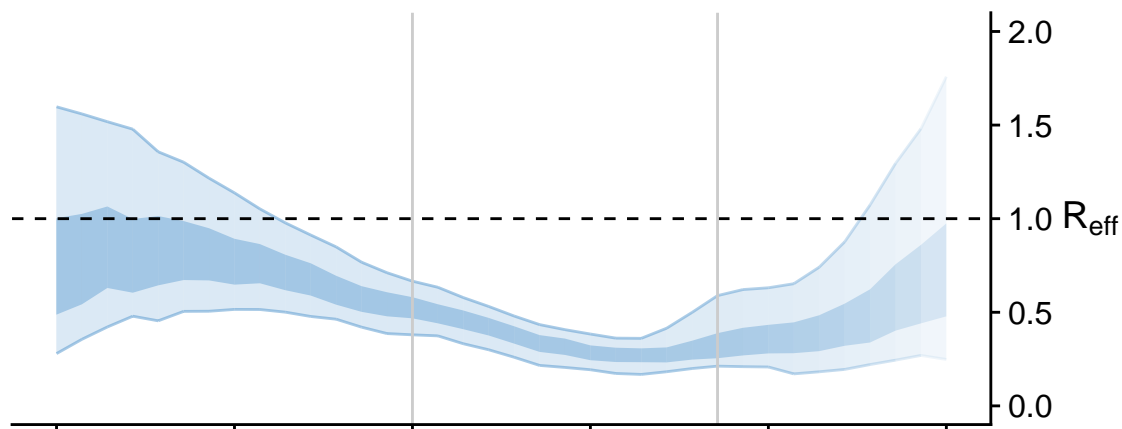**South Australia (SA)**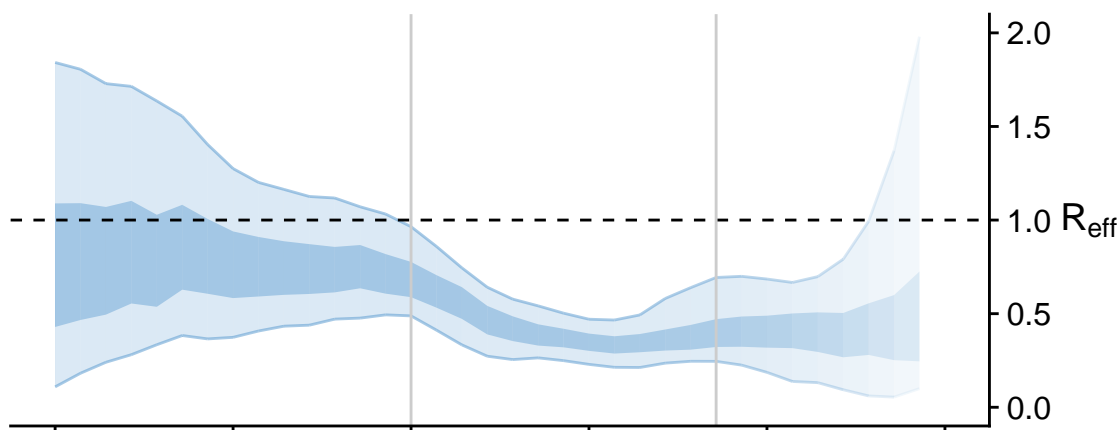**Victoria (VIC)**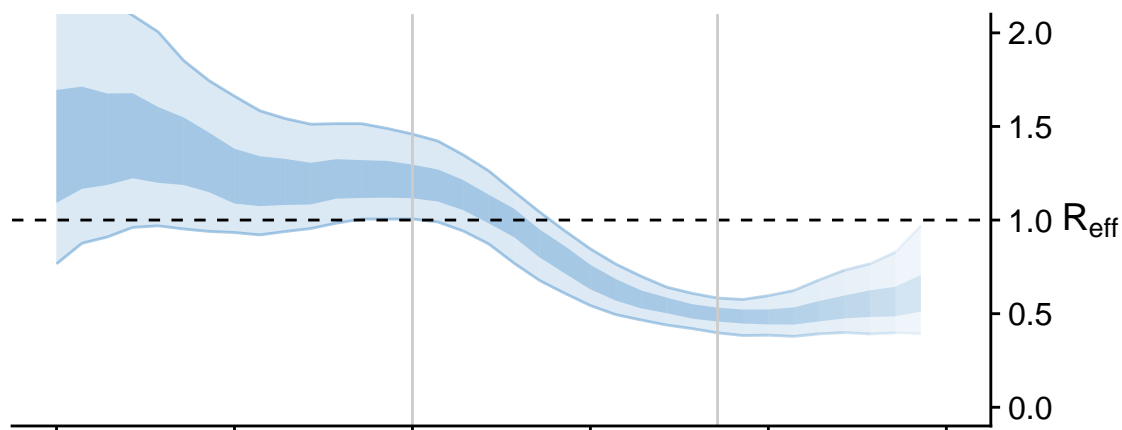**Western Australia (WA)**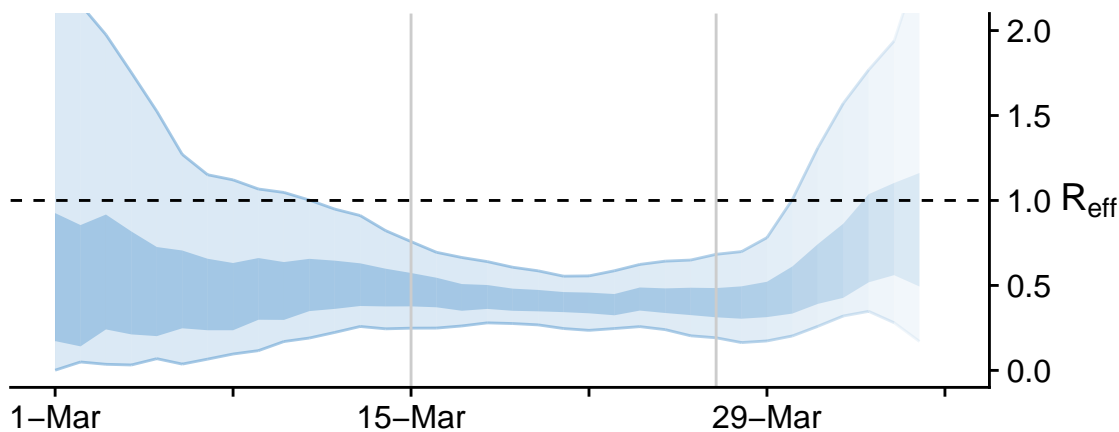

1-Mar

15-Mar

29-Mar
