# Supplementary figures and images for: Early analysis of the Australian COVID-19 epidemic
Source: eLife journal article supplement (doi:10.7554/elife.58785), 2020-08-13

Unknown origin    Locally acquired    Overseas acquired

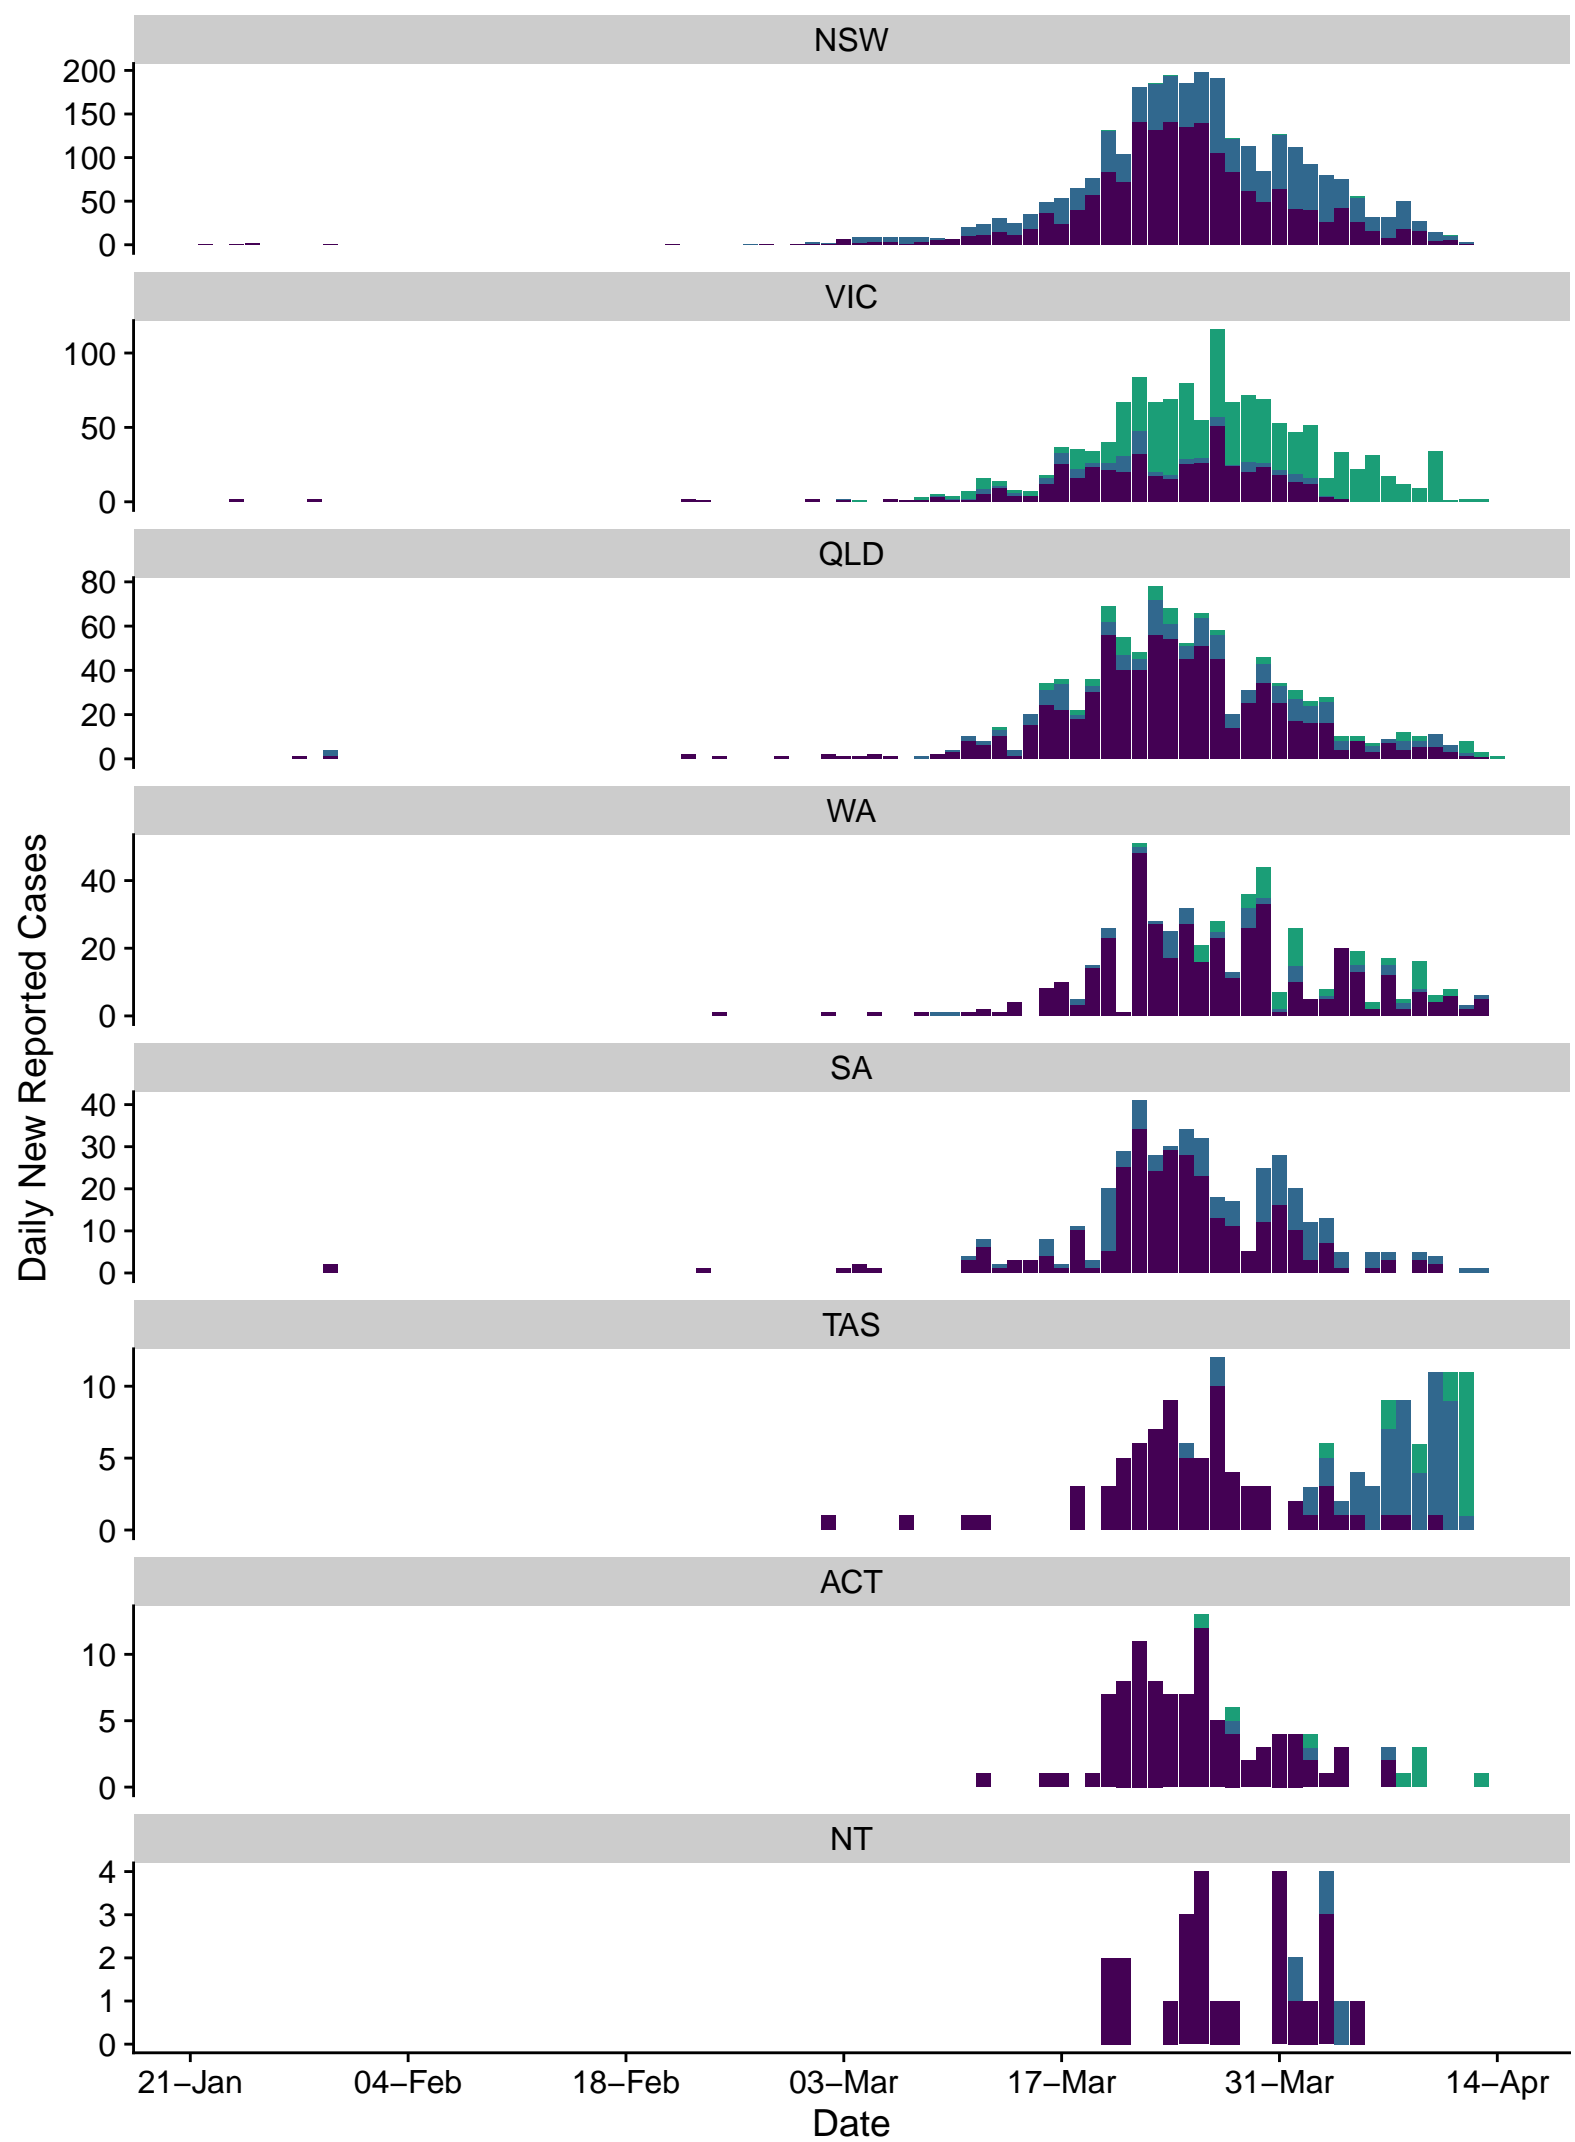

Supplement: supp [file elife-58785-supp-v1.zip › elife_poa_e58785_Figure_1_figure_supplement_1.pdf]

National announcements

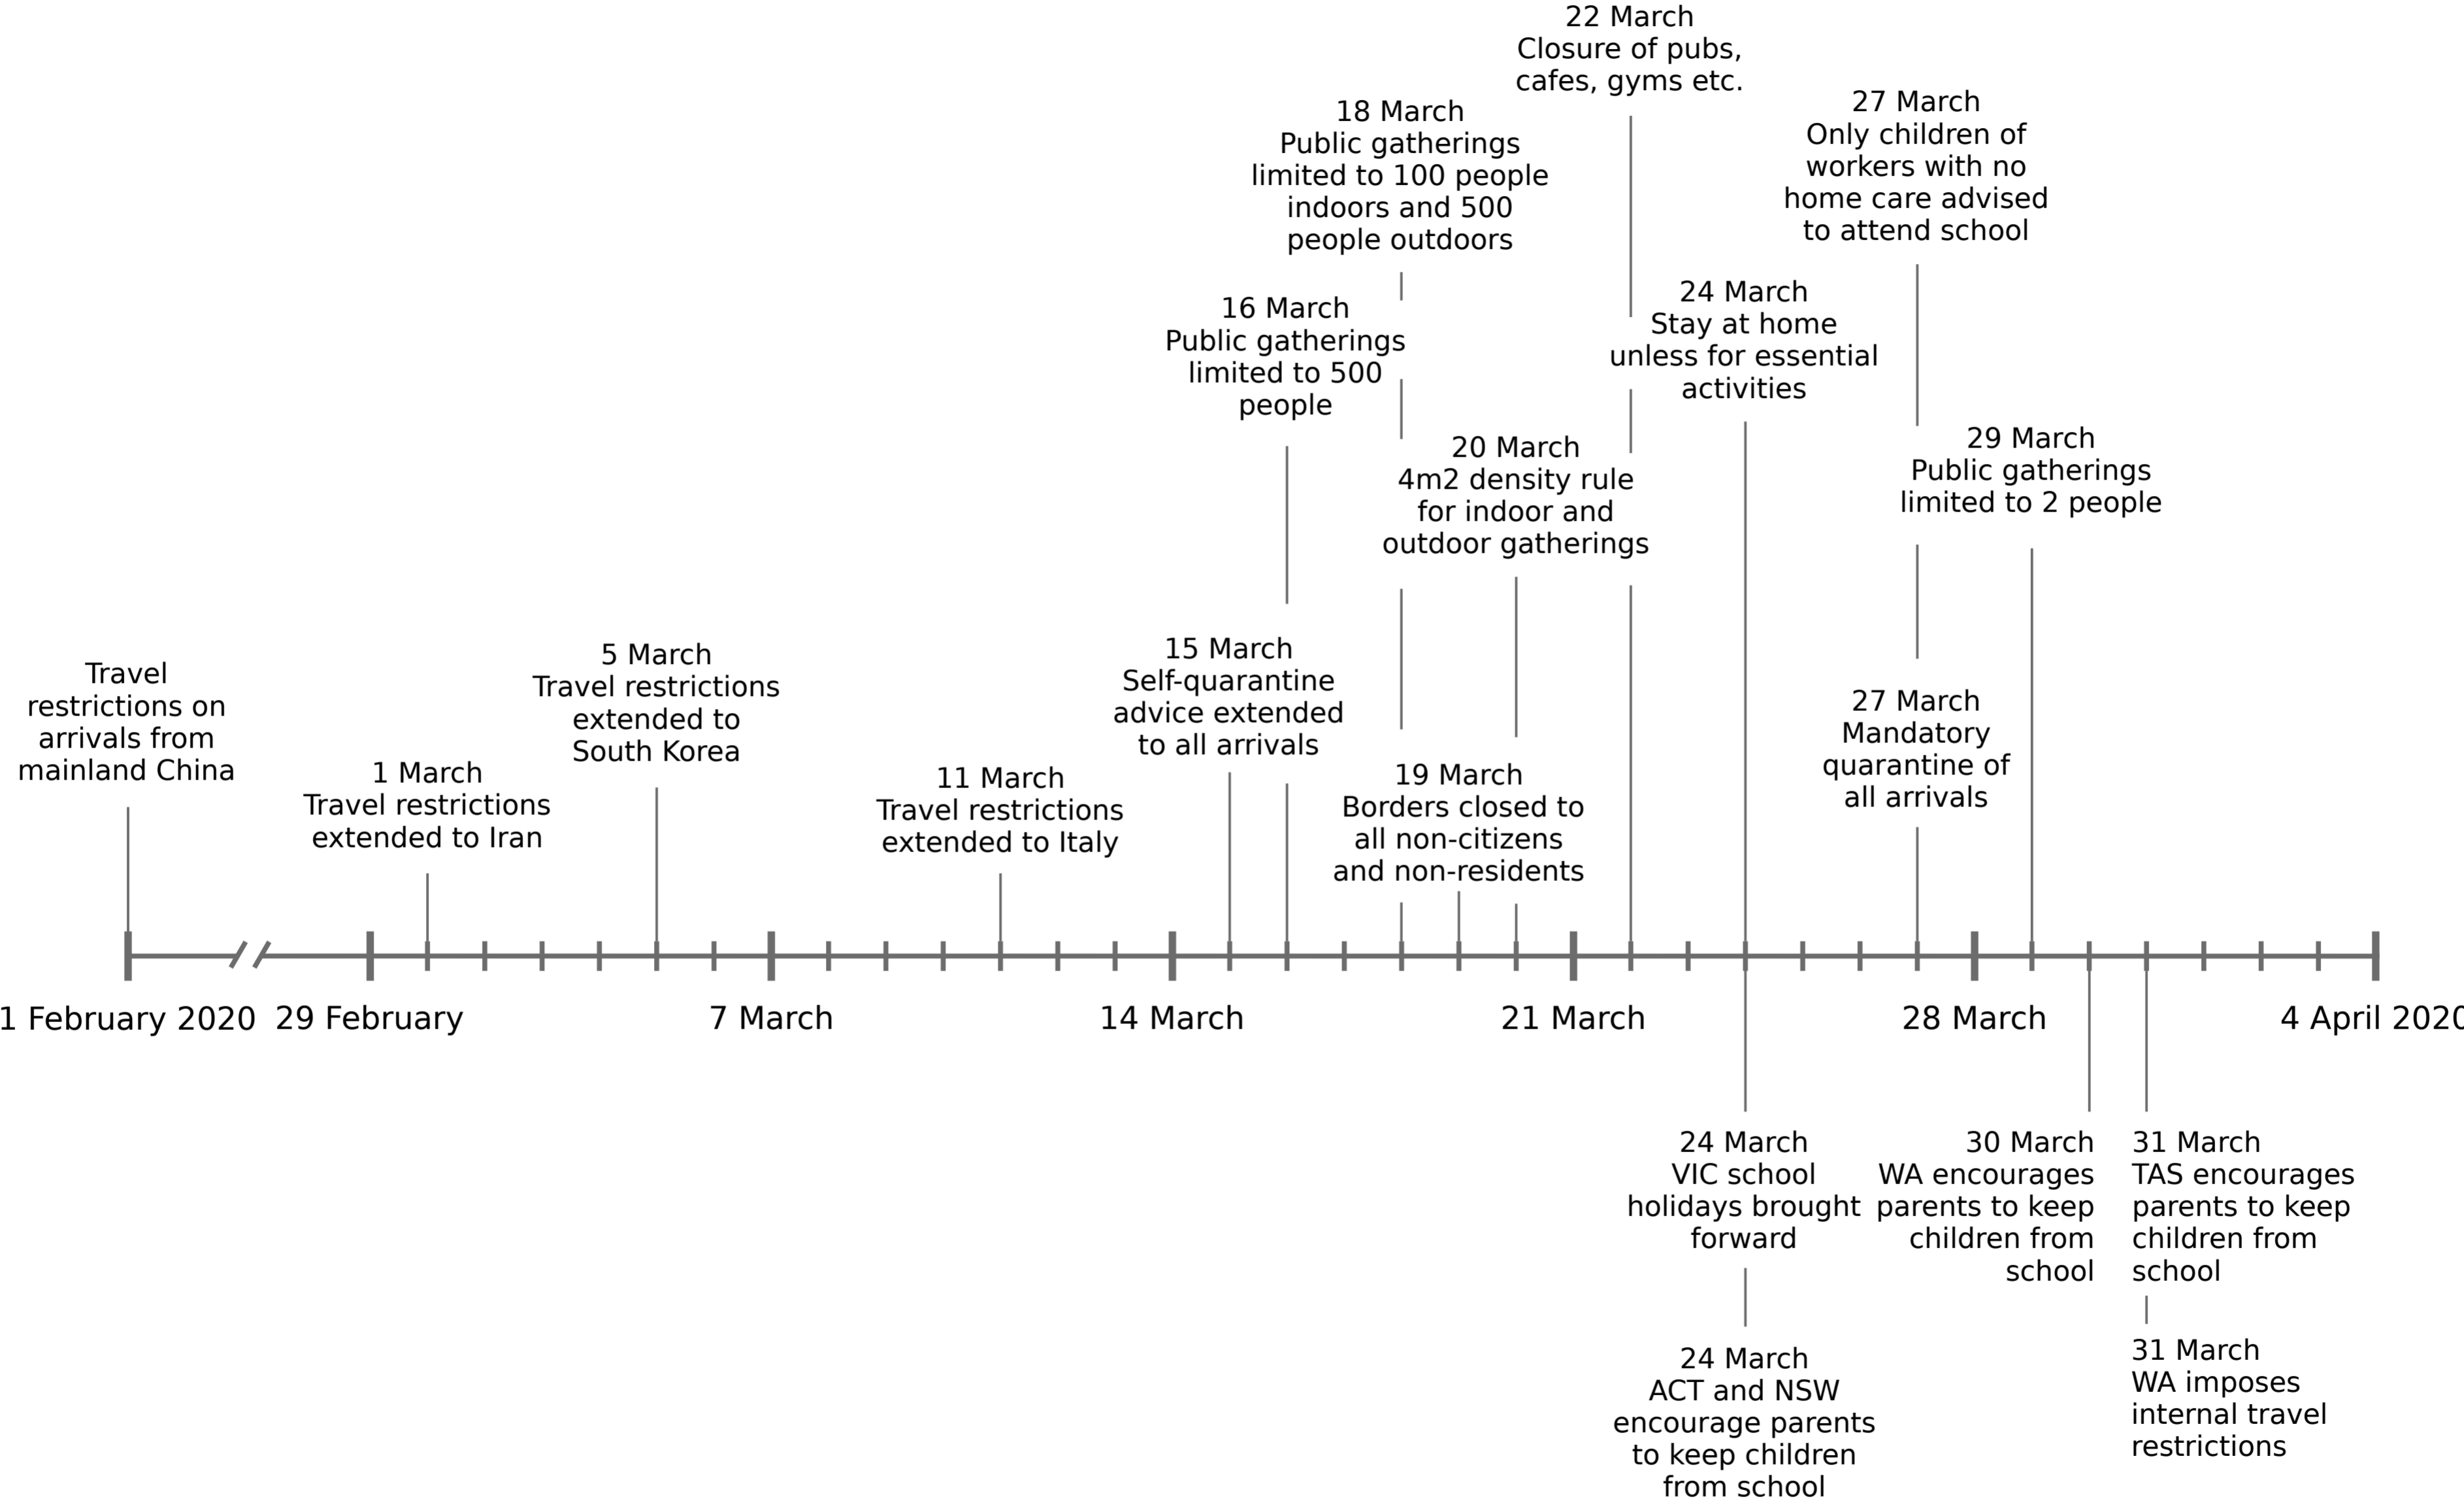

State/territory specific announcements

Supplement: supp [file elife-58785-supp-v1.zip › elife_poa_e58785_Figure_1_figure_supplement_2.pdf]

**New South Wales (NSW)**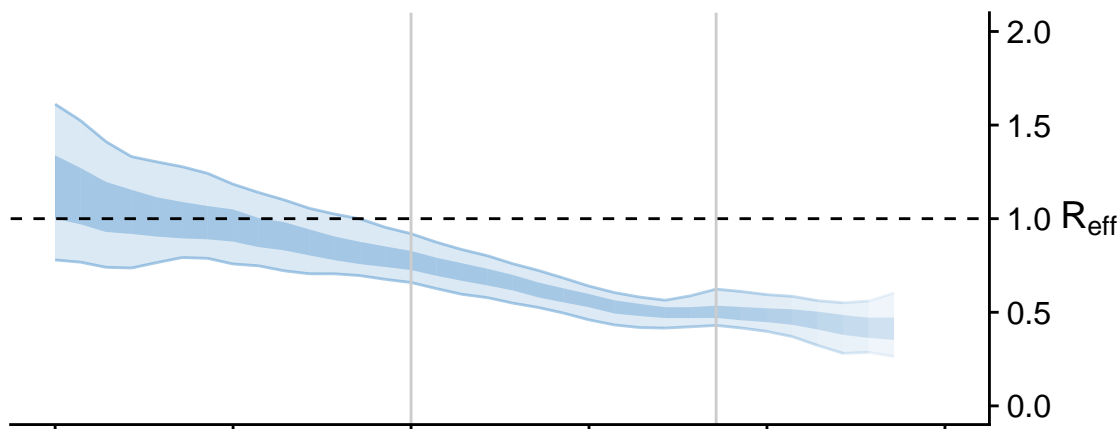**Queensland (QLD)**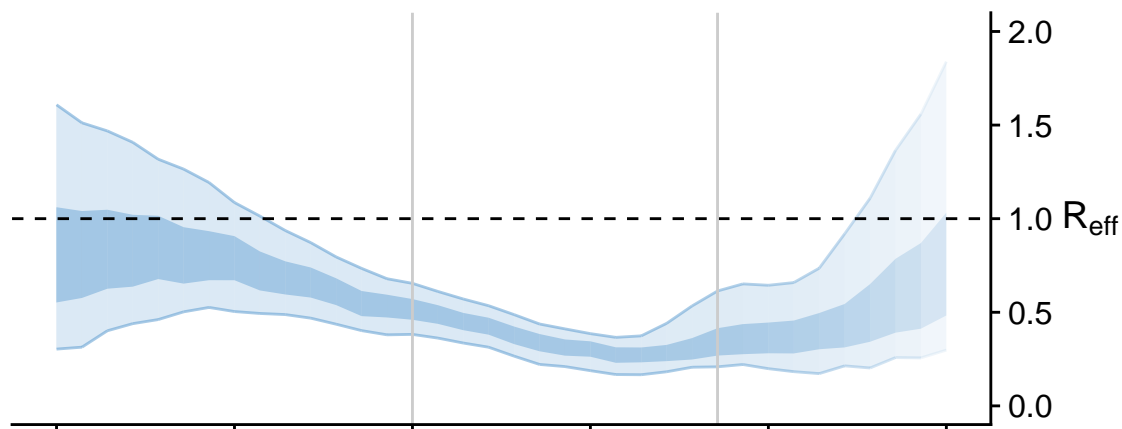**South Australia (SA)**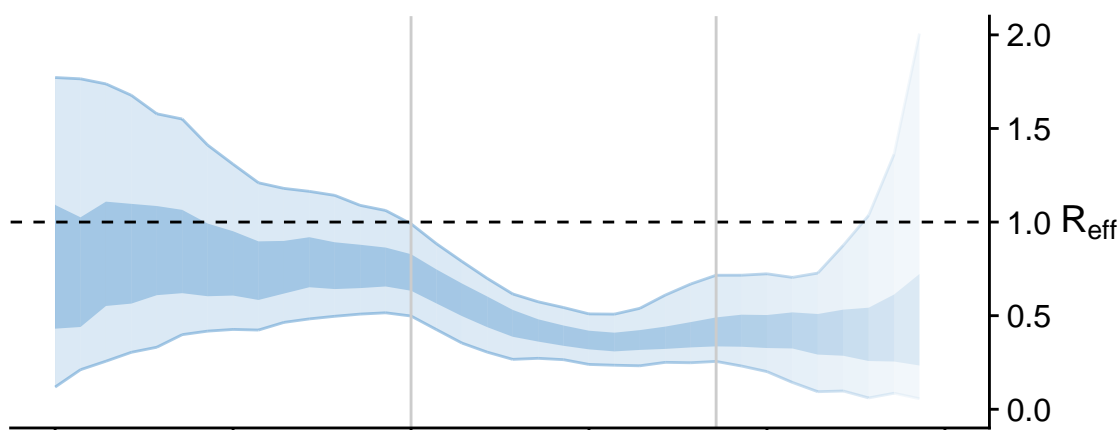**Victoria (VIC)**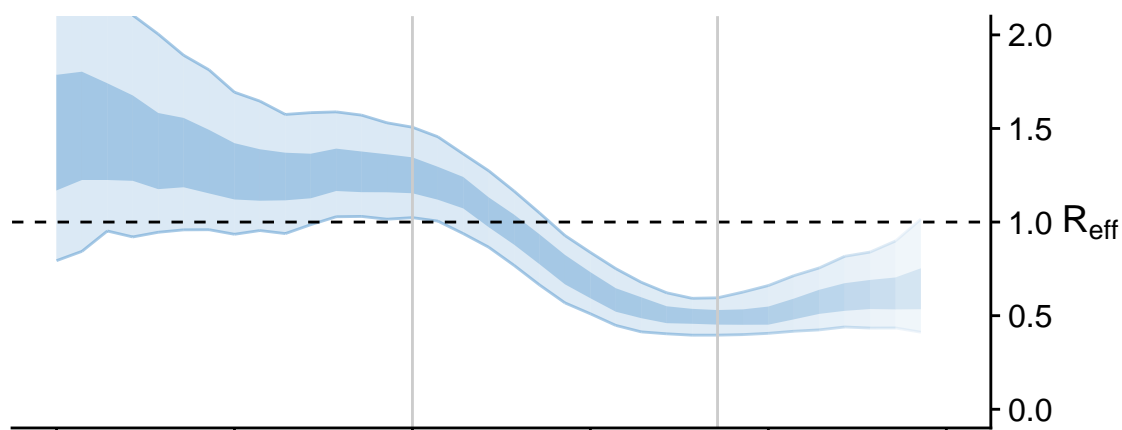**Western Australia (WA)**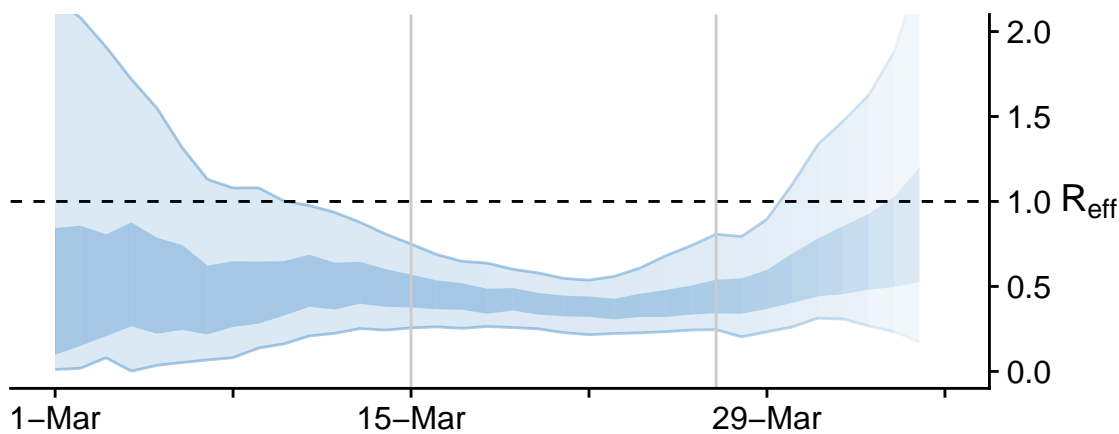

Supplement: supp [file elife-58785-supp-v1.zip › elife_poa_e58785_Figure_2_figure_supplement_1.pdf]

**New South Wales (NSW)**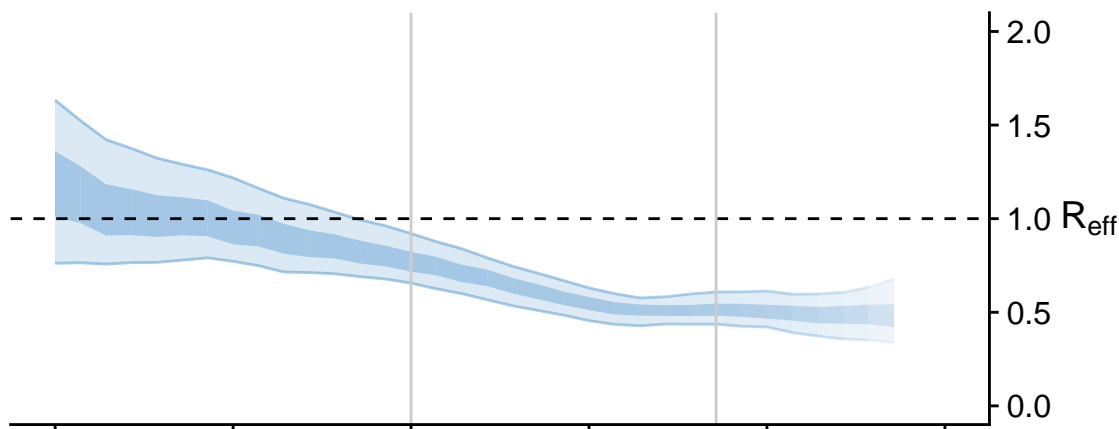**Queensland (QLD)**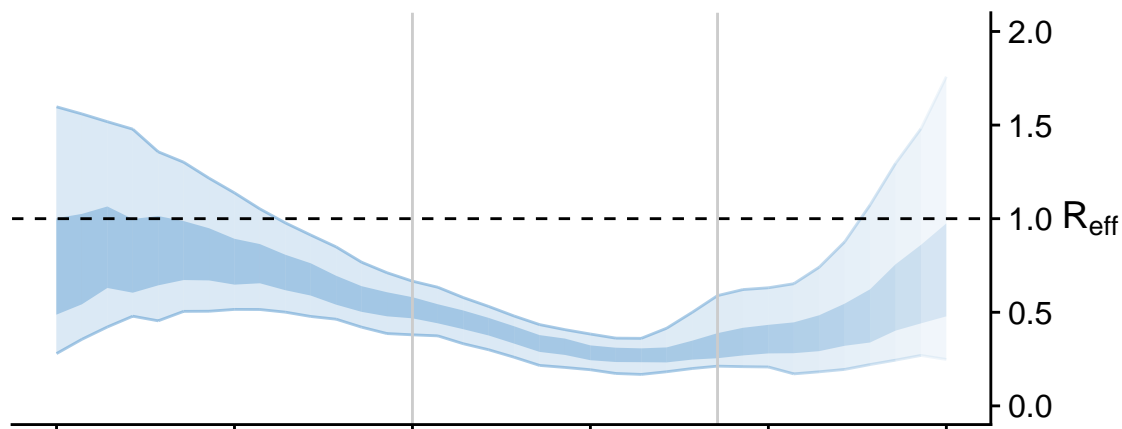**South Australia (SA)**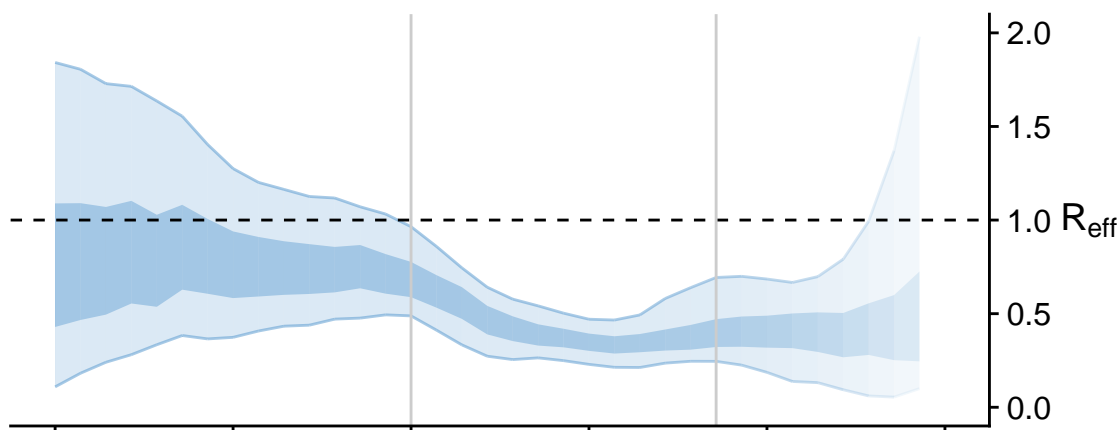**Victoria (VIC)**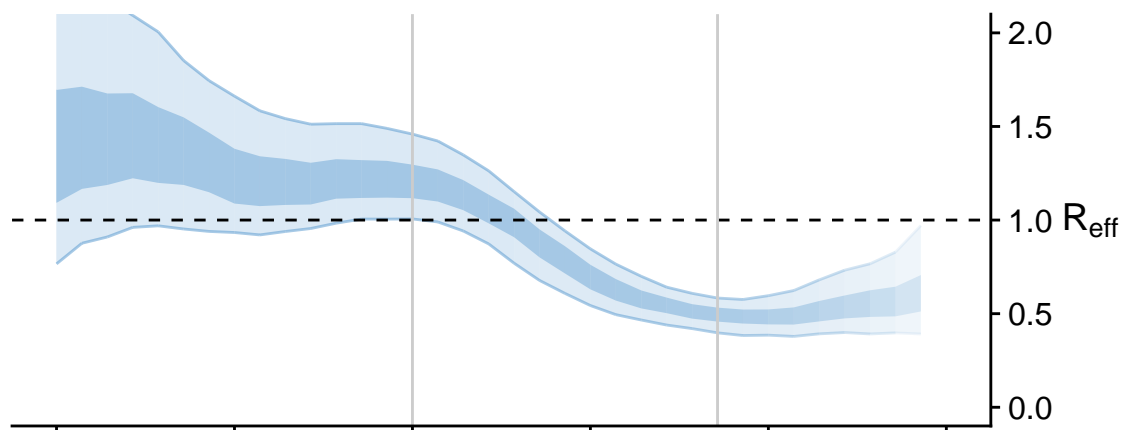**Western Australia (WA)**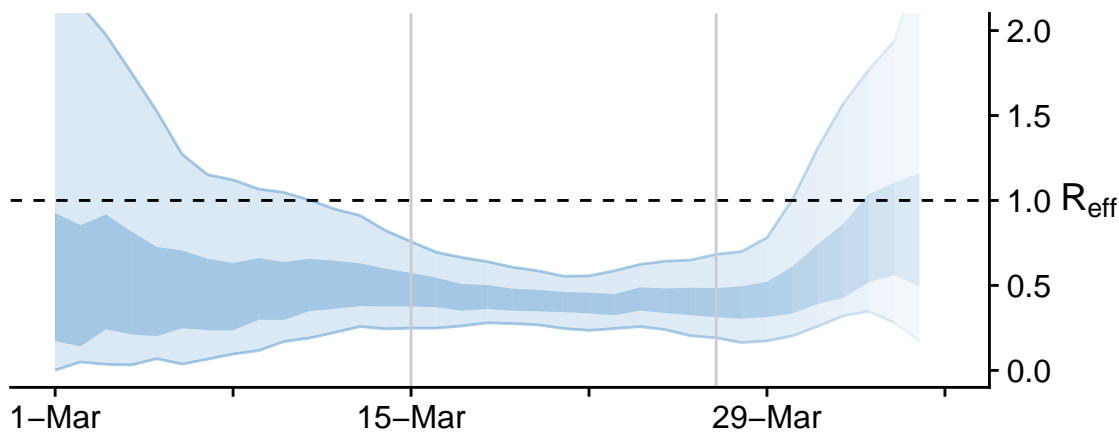

Supplement: supp [file elife-58785-supp-v1.zip › elife_poa_e58785_Figure_2_figure_supplement_2.pdf]

**New South Wales (NSW)**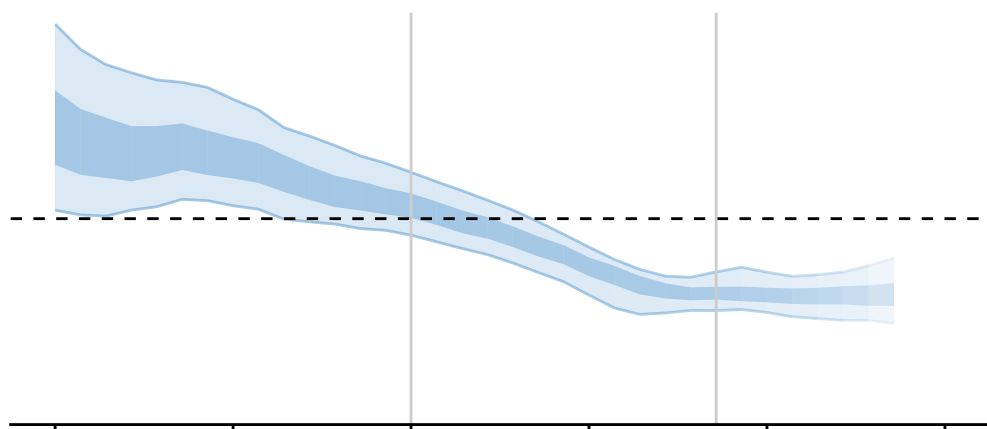**Queensland (QLD)**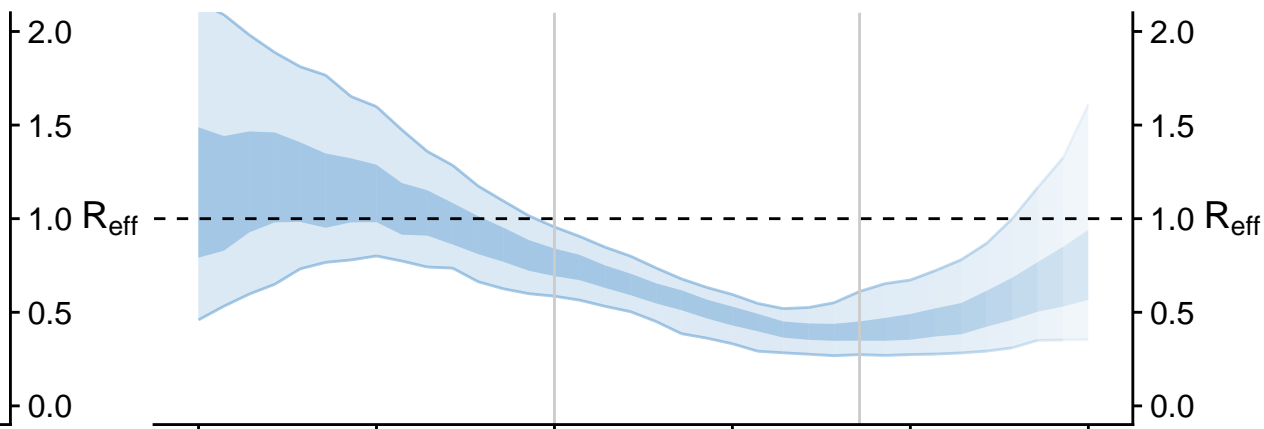**South Australia (SA)**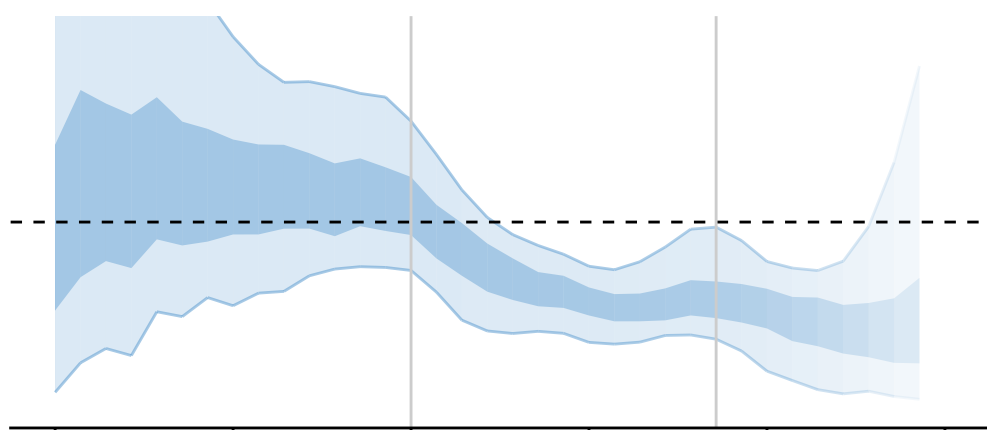**Victoria (VIC)**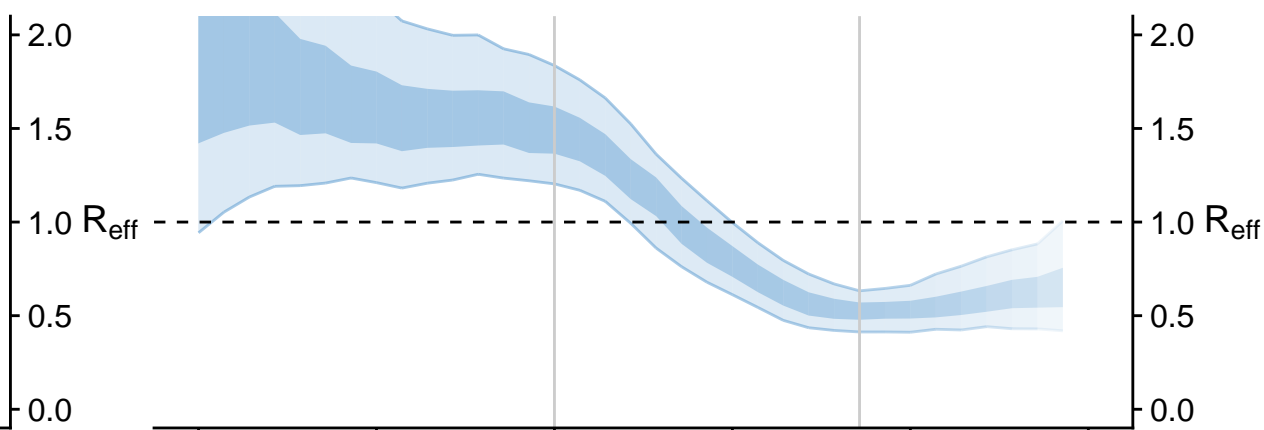**Western Australia (WA)**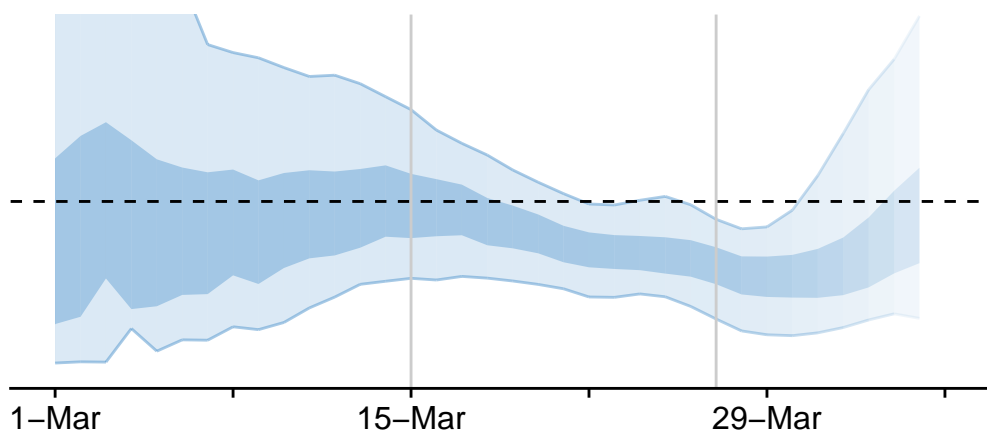

Supplement: supp [file elife-58785-supp-v1.zip › elife_poa_e58785_Figure_2_figure_supplement_3.pdf]

Model Observed

Daily New Cases

400  
300  
200  
100  
0

01-Mar 08-Mar 15-Mar 22-Mar 29-Mar 05-Apr 12-Apr 19-Apr 26-Apr

Date

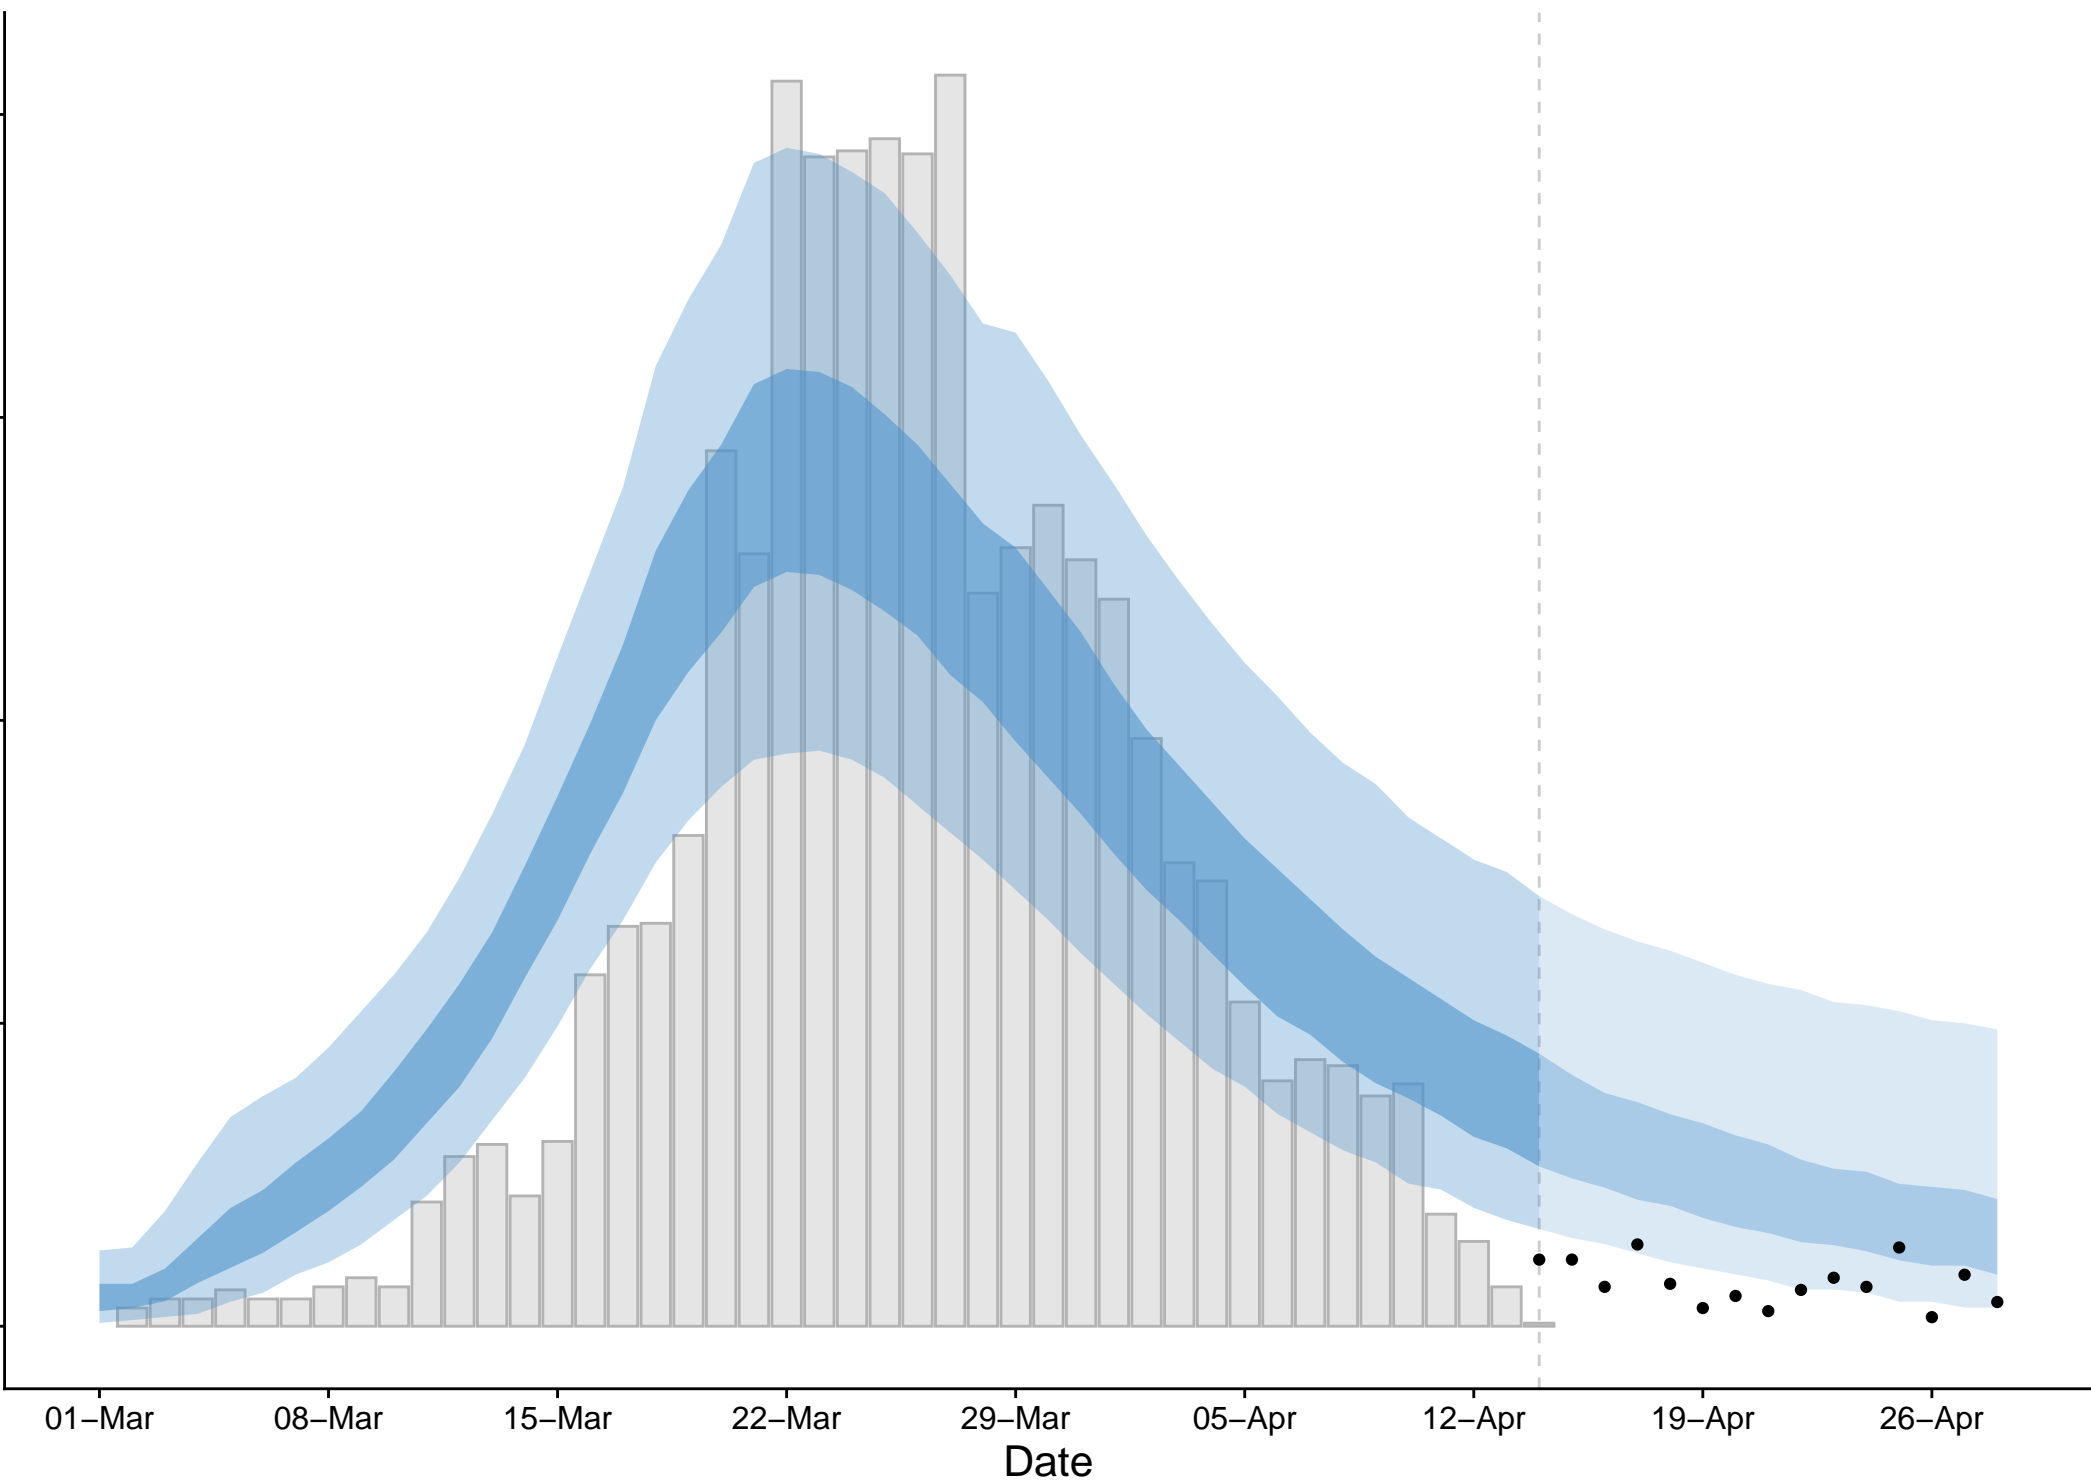

Supplement: supp [file elife-58785-supp-v1.zip › elife_poa_e58785_Figure_3_figure_supplement_1.pdf]
